# Supplementary material for: Thermoelectric properties of n-type Cu4Sn7S16-based compounds
Source: Royal Society of Chemistry journal article supplement (doi:10.1039/c9ra00077a), 2019-01-01
Supplement: c9ra00077a1.pdf [file c9ra00077a1.pdf]

## Supporting Information

### Thermoelectric properties of *n*-type $\text{Cu}_4\text{Sn}_7\text{S}_{16}$ -based compounds

Tingting Deng,<sup>abc</sup> Tian-Ran Wei,<sup>\*a</sup> Qingfeng Song,<sup>ab</sup> Qing Xu,<sup>abc</sup> Dudi Ren,<sup>a</sup> Pengfei Qiu,<sup>a</sup> Xun Shi,<sup>\*a</sup> Lidong Chen<sup>a</sup>

<sup>a</sup>State Key Laboratory of High Performance Ceramics and Superfine Microstructure, Shanghai Institute of Ceramics, Chinese Academy of Sciences, Shanghai 200050, China

<sup>b</sup>Center of Materials Science and Optoelectronics Engineering, University of Chinese Academy of Sciences, Beijing 100049, China

<sup>c</sup>School of Physical Science and Technology, ShanghaiTech University, Shanghai 201210, China

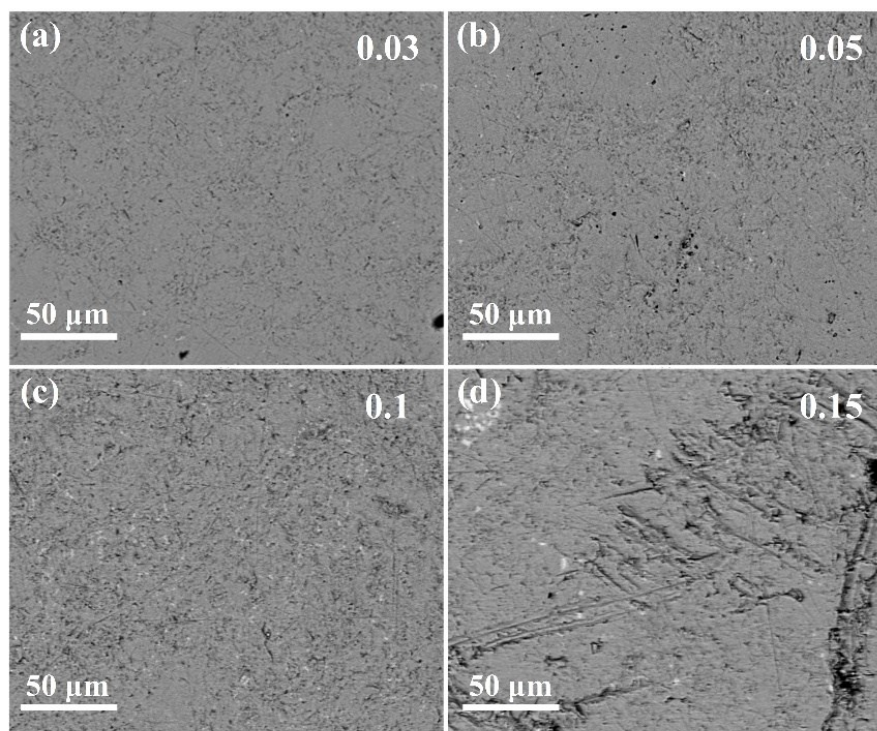

**Fig. S1** Backscattered electron (BSE) patterns of  $\text{Cu}_{4-x}\text{Ag}_x\text{Sn}_7\text{S}_{16}$  ( $x = 0.03, 0.05, 0.1, 0.15$ ). Impurity phases (white particles) emerge when  $x$  reaches 0.05.

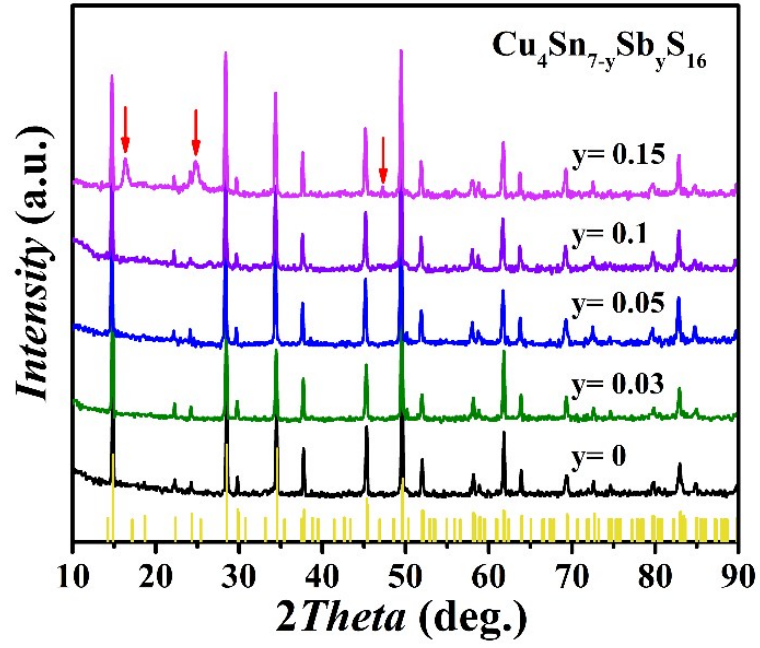

**Fig. S2** XRD patterns of  $\text{Cu}_4\text{Sn}_{7-y}\text{Sb}_y\text{S}_{16}$  ( $y=0, 0.03, 0.05, 0.1, 0.15$ ) bulks after SPS.

Impurity phases emerge when  $y$  reaches 0.15.

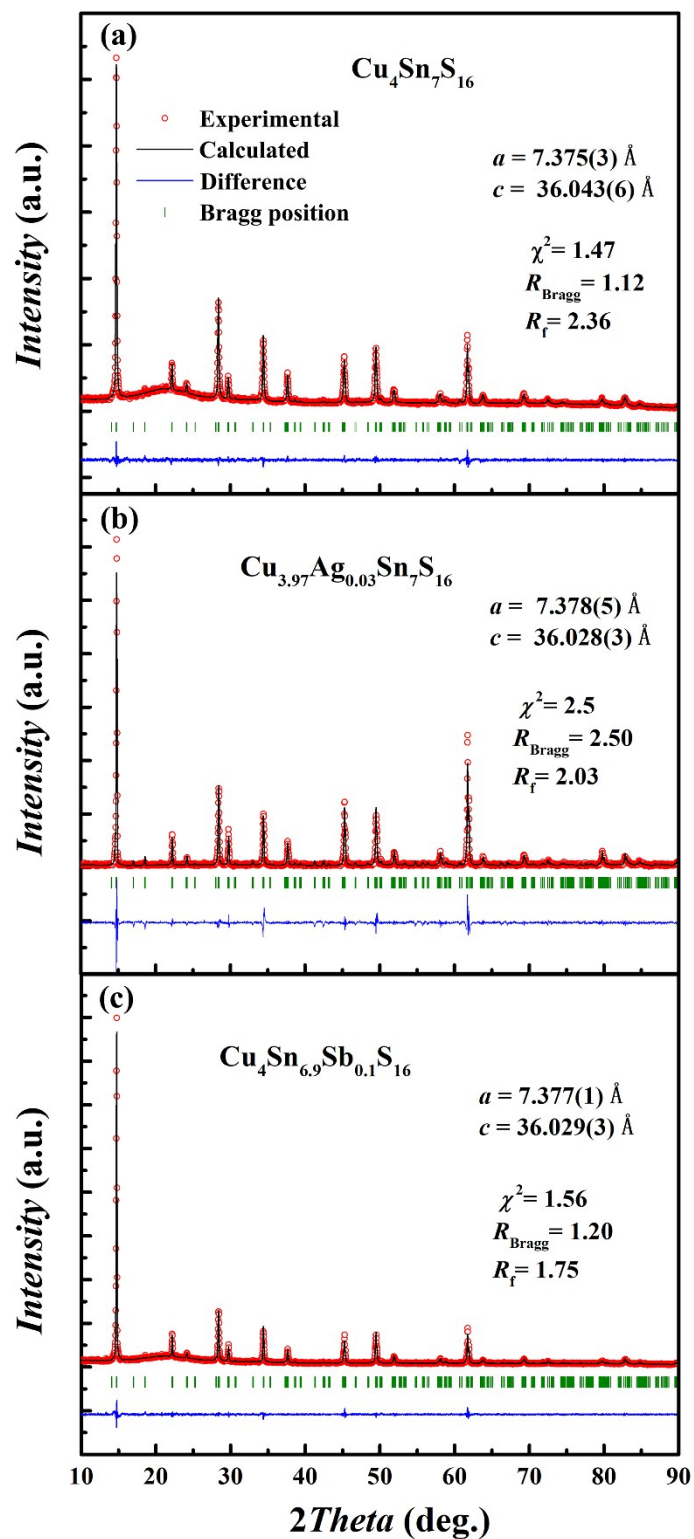

Fig. S3 Rietveld refinements for (a)  $\text{Cu}_4\text{Sn}_7\text{S}_{16}$ ; (b)  $\text{Cu}_{3.97}\text{Ag}_{0.03}\text{Sn}_7\text{S}_{16}$ ; (c)

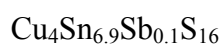

**Table S1** Refined lattice parameters for  $\text{Cu}_4\text{Sn}_7\text{S}_{16}$ ,  $\text{Cu}_{3.97}\text{Ag}_{0.03}\text{Sn}_7\text{S}_{16}$  and

|                                     | $\text{Cu}_4\text{Sn}_{6.9}\text{Sb}_{0.1}\text{S}_{16}$ |                                                            |                                                          |
|-------------------------------------|----------------------------------------------------------|------------------------------------------------------------|----------------------------------------------------------|
|                                     | $\text{Cu}_4\text{Sn}_7\text{S}_{16}$                    | $\text{Cu}_{3.97}\text{Ag}_{0.03}\text{Sn}_7\text{S}_{16}$ | $\text{Cu}_4\text{Sn}_{6.9}\text{Sb}_{0.1}\text{S}_{16}$ |
| $a$ (Å)                             | 7.375                                                    | 7.379                                                      | 7.378                                                    |
| $c$ (Å)                             | 36.04                                                    | 36.03                                                      | 36.03                                                    |
| $V_{\text{cell}}$ (Å <sup>3</sup> ) | 1697.94                                                  | 1698.69                                                    | 1698.12                                                  |
